# Supplementary material for: Systematic comparison of small RNA library preparation protocols for next-generation sequencing
Source: PubMed Central journal article supplement (PMC5799908; doi:10.1186/s12864-018-4491-6), 2018-02-05
Supplement: 12864_2018_4491_MOESM7_ESM.pdf [file 12864_2018_4491_MOESM7_ESM.pdf]

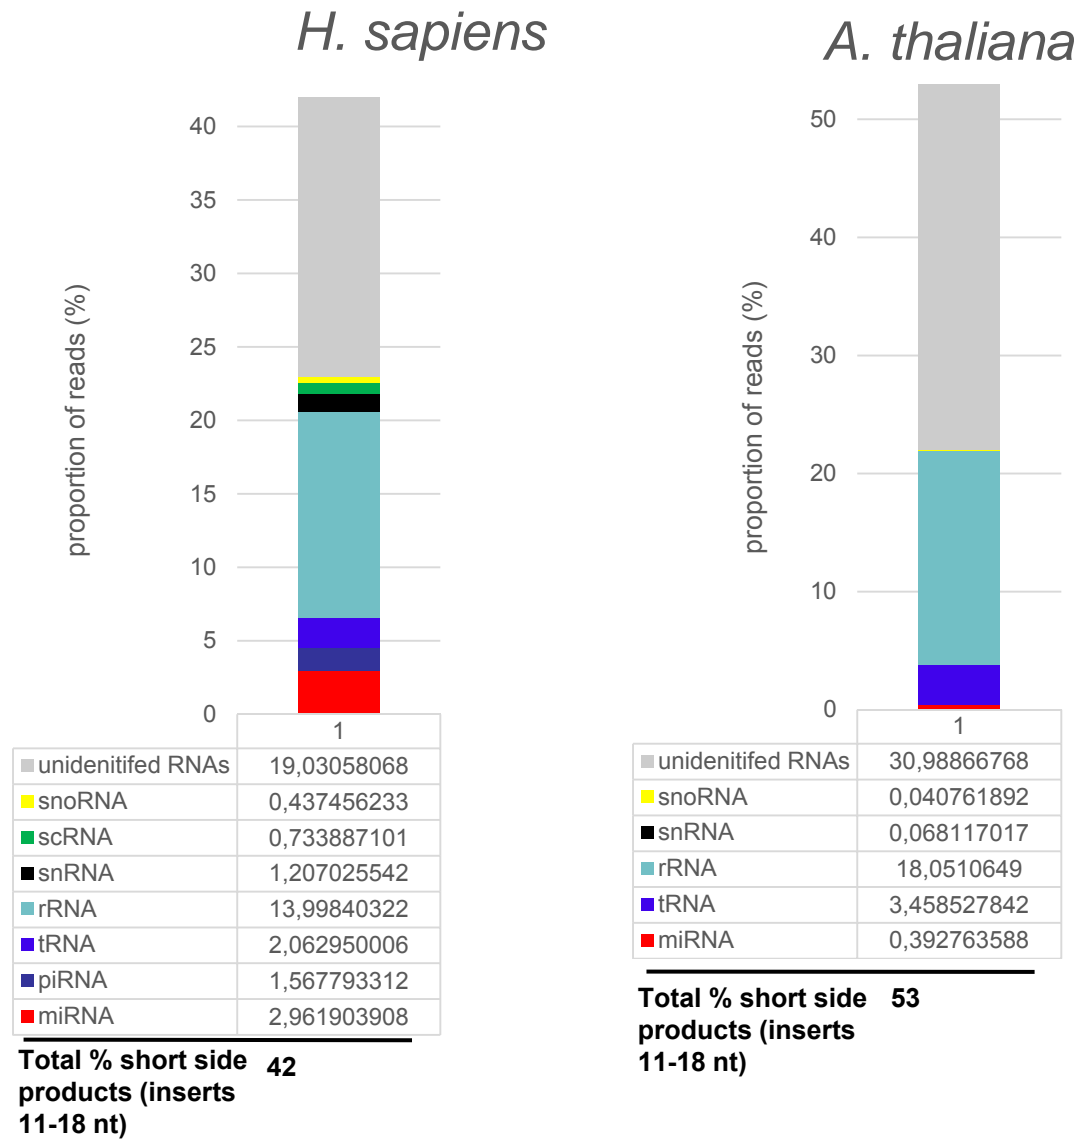

Figure S7
